# Supplementary material for: Urethral Sphincter Length but Not Prostatic Apex Shape in Preoperative MRI Is Associated with Mid-Term Continence Rates after Radical Prostatectomy
Source: MDPI journal article supplement (doi:10.3390/diagnostics12030701), 2022-03-13
Supplement: s1 [file s1]

**Supplementary Table S1.** Univariable and multivariable logistic regression models predicting urinary continence at medium follow-up following radical prostatectomy, defined as none or one safety pad per 24hours.

|                                                | Univariable |          |           |         | Multivariable |          |           |         |
|------------------------------------------------|-------------|----------|-----------|---------|---------------|----------|-----------|---------|
|                                                | Odds ratio  | CI 2.5 % | CI 97.5 % | p-value | Odds ratio    | CI 2.5 % | CI 97.5 % | p-value |
| <b>Urethral sphincter length, coronal</b>      | 1.42        | 1.09     | 1.96      | 0.02    | -             | -        | -         | -       |
| <b>Urethral sphincter length, sagittal</b>     | 1.69        | 1.31     | 2.33      | >0.001  | -             | -        | -         | -       |
| <b>Urethral sphincter length, axial</b>        | 0.94        | 0.62     | 1.43      | 0.77    | -             | -        | -         | -       |
| <b>Diameter of urethral sphincter, coronal</b> | 0.88        | 0.57     | 1.33      | 0.54    | -             | -        | -         | -       |
| <b>Lee-type</b>                                |             |          |           |         |               |          |           |         |
| A                                              | <i>Ref.</i> |          |           |         | <i>Ref.</i>   |          |           |         |
| B                                              | 0.56        | 0.06     | 5.91      | 0.61    | 7.49          | 0.25     | 288.47    | 0.26    |
| C                                              | 1.50        | 0.13     | 35.90     | 0.76    | 0.06          | 0.01     | 2.78      | 0.14    |
| D                                              | 2.14        | 0.40     | 9.72      | 0.34    | 4.04          | 0.54     | 35.08     | 0.17    |
| <b>Age</b>                                     | 0.88        | 0.79     | 0.97      | 0.02    | 0.80          | 0.65     | 47.68     | 0.02    |
| <b>Prostate volume</b>                         | 0.99        | 0.95     | 1.03      | 0.63    | -             | -        | -         | -       |
| <b>pT-stage</b>                                |             |          |           |         |               |          |           |         |
| pT2                                            | <i>Ref.</i> |          |           |         | -             | -        | -         | -       |
| >pT2                                           | 0.49        | 0.14     | 1.67      | 0.25    | -             | -        | -         | -       |
| <b>Surgical approach</b>                       |             |          |           |         |               |          |           |         |
| Open RP                                        |             |          |           |         | <i>Ref.</i>   |          |           |         |
| Robotic-assisted RP                            | 5.40        | 1.46     | 26.17     | 0.02    | 3.16          | 0.38     | 29.90     | 0.28    |
| <b>Nerve sparing approach</b>                  |             |          |           |         |               |          |           |         |
| None                                           | <i>Ref.</i> |          |           |         | <i>Ref.</i>   |          |           |         |
| Yes                                            | 11.78       | 2.01     | 94.71     | 0.01    | 1.16          | 0.05     | 47.68     | 0.92    |
| <b>Pathological ISUP</b>                       |             |          |           |         |               |          |           |         |
| 1/2/3                                          | <i>Ref.</i> |          |           |         | <i>Ref.</i>   |          |           |         |
| 4/5                                            | 0.12        | 0.03     | 0.51      | 0.004   | 0.16          | 0.01     | 1.48      | 0.12    |

Abbreviations: RP= Radical prostatectomy; CI= Confidence interval; ISUP= International Society of Urological Pathology;
